# Supplementary material for: Recyclable HF-free Ti3C2Tx 3D-printed supercapacitors: their second life in sodium-ion batteries
Source: Royal Society of Chemistry journal article supplement (doi:10.1039/d4ta07436j), 2024-12-02
Supplement: d4ta07436j1.pdf [file d4ta07436j1.pdf]

## Supplementary information

# Recyclable HF-free $\text{Ti}_3\text{C}_2\text{T}_x$ 3D-printed supercapacitors: second life in sodium-ion batteries

*Bindu Kalleshappa<sup>a</sup>, Martin Pumera<sup>abc\*</sup>*

<sup>a</sup>Future Energy and Innovation Laboratory, Central European Institute of Technology,  
Brno University of Technology, Purkyňova 123, 61200 Brno, Czech Republic.

<sup>b</sup> Advanced Nanorobots & Multiscale Robotics Laboratory, Faculty of Electrical Engineering  
and Computer Science, VSB - Technical University of Ostrava, 17. listopadu 2172/15, 70800  
Ostrava, Czech Republic

<sup>c</sup>Department of Medical Research, China Medical University Hospital, China

Medical University, No. 91 Hsueh-Shih Road, Taichung 40402, Taiwan

\*Corresponding author

**Table S1.** The (0 0 2) position and d-spacing of  $Ti_3C_2T_x$  Mxene synthesised using different techniques.

| Method                                              | Etchant                      | Temperature      | Duration          | (0 0 2) peak position | d-spacing (Å) | c-LP (Å) | Reference |
|-----------------------------------------------------|------------------------------|------------------|-------------------|-----------------------|---------------|----------|-----------|
| Molten Salt                                         | CuCl <sub>2</sub> :KCl:NaCl  | 680 °C           | 24 hours          | 8.07°                 | 10.94         |          | 1         |
| Molten Salt (Insitu preparation of MAX and etching) | CuCl <sub>2</sub> :KCl:NaCl  | 700 °C           | 10 hours : 10 min |                       | 11.07         | 22.13    | 2         |
| Molten Salt                                         | SnF <sub>2</sub>             | 550 °C           | 6 hours           | 9.4°                  |               |          | 3         |
| Molten Salt                                         | CuCl <sub>2</sub> :KCl:NaCl  | 700 °C           | 40 min            | 7.94°                 | 11.1          |          | 4         |
| Acid etching                                        | 20% HF                       | Room temperature | 11 hours          | 8.9 °                 |               |          | 5         |
| Insitu HF etching method                            | 6M HCl:LiF                   | 40 °C            | 40 hours          | 6.9°                  |               |          | 6         |
| HF etching                                          | Conc. HF                     | Room temperature | 10 hours          | -                     | -             | -        | 7         |
| Wet-etching alkalization strategy                   | Fluoride salts               | Room Temperature |                   |                       | 12 to 15      |          | 8         |
| Acid solution etching                               | HF                           | Room temperature | 24 hours          | 9°                    | 19.62         |          | 9         |
| Acid solution etching                               | LiF:HCl                      | 60 °C            | 50 hours          | 7.67°                 | 22.05         |          | 9         |
| Acid solution etching                               | FeF <sub>3</sub> :HCl        | 60 °C            | 25 hours          | 8.01°                 | 23.02         |          | 9         |
| Molten Salt                                         | KF:NaF:oxalic acid dihydrate | 400 °C           | 10 hours          | 6.9                   |               | 25.72    | This work |

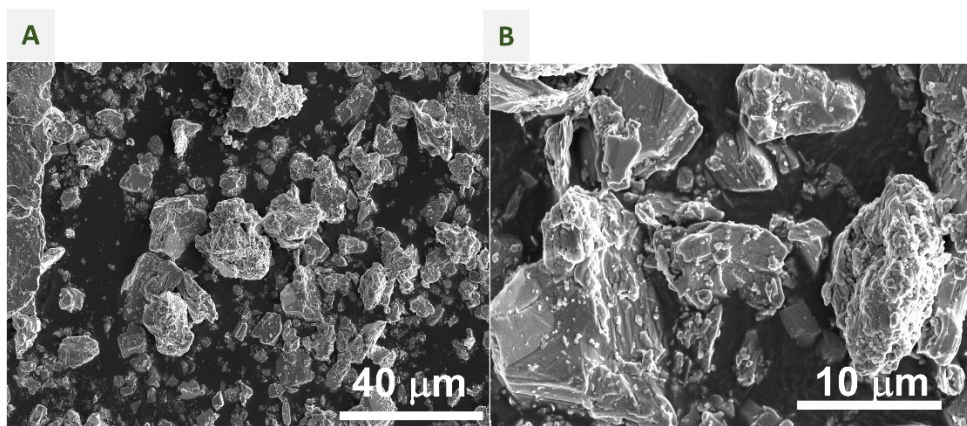

Figure S1. SEM images of MSTC-00 at different magnifications.

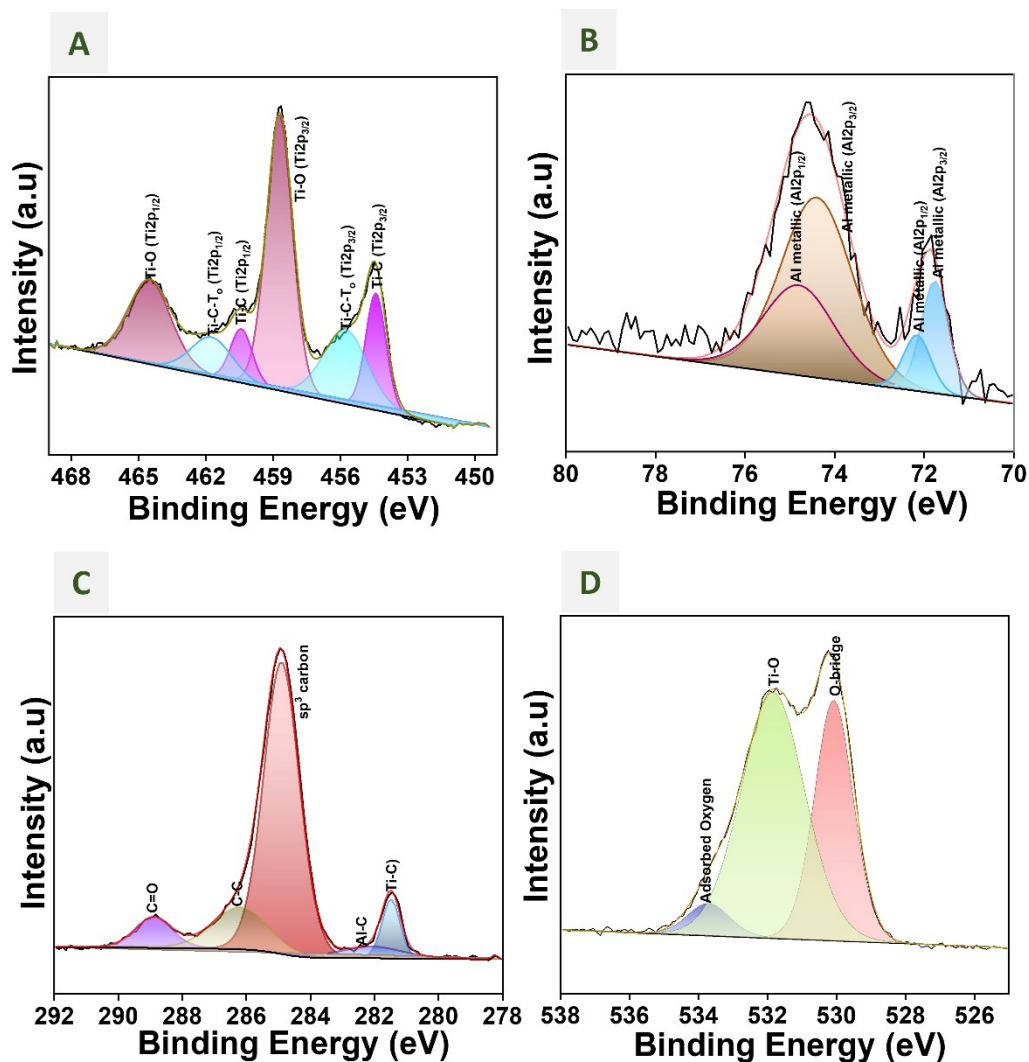

Figure S2. High resolution XPS of (A) Ti 2p, (B) Al 2p, (C) C 1s and (D) O 1s of  $\text{Ti}_3\text{AlC}_2$  MAX phase.

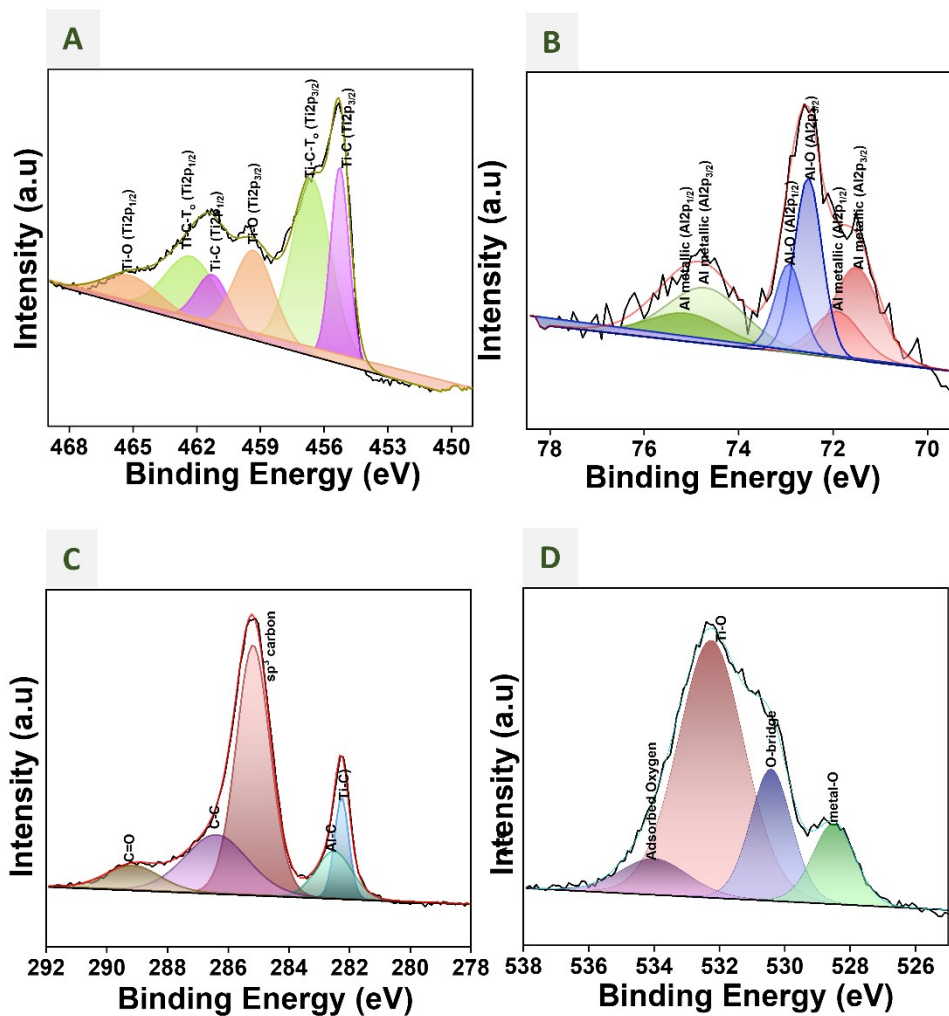

Figure S3. High resolution XPS of (A) Ti 2p, (B) Al 2p, (C) C 1s and (D) O 1s of MSTC-00.

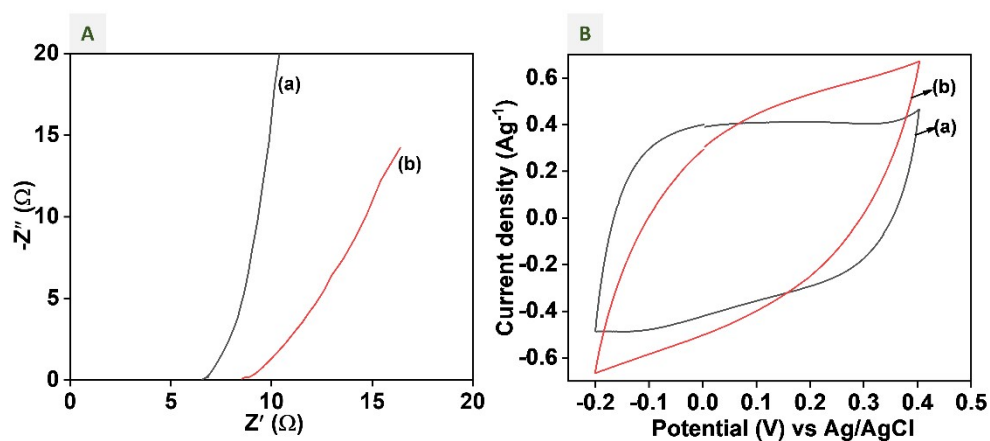

Figure S4. (A) Nyquist plots and (B) cyclic voltammograms of (a) commercial  $Ti_3C_2$  and (b) MSTC-OX.

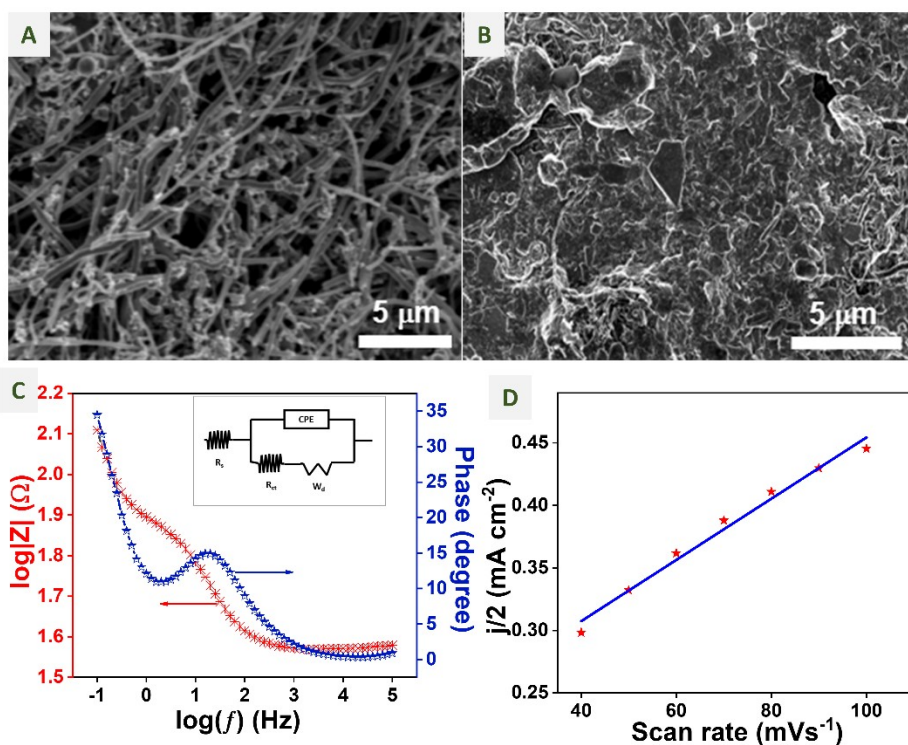

**Figure S5.** SEM images of (A) activated 3DE and (B) TC-3DE. (C) Bode plots of TC-3DE (inset: equivalent circuit), and (D) current density versus scan rate curves of TC-3DE in 1 M  $\text{H}_2\text{SO}_4$  against Ag/AgCl (3M KCl).

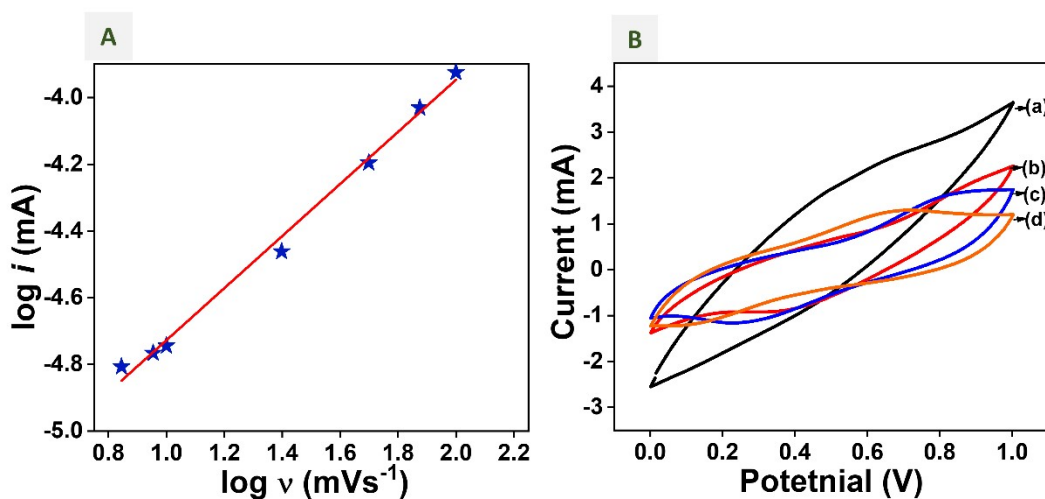

**Figure S6.** (A)  $\log i$  versus  $\log v$  curves of TC-3DE supercapacitors and (B) cyclic voltammograms of symmetric TC-3DE cell for 5000 cycles (cycle (a) 2<sup>nd</sup>, (b) 500<sup>th</sup>, (c) 1000<sup>th</sup>, (d) 5000<sup>th</sup>).

**Table S2.** Performance of 3D printed  $\text{Ti}_3\text{C}_2\text{T}_x$  based supercapacitors.

| Material                                                                             | Electrolyte (Gel)                         | Specific capacity                                | Energy Density             | Power density             | Reference |
|--------------------------------------------------------------------------------------|-------------------------------------------|--------------------------------------------------|----------------------------|---------------------------|-----------|
| 2D $\text{Ti}_3\text{C}_2\text{T}_x$ microsupercapacitor MSC-1                       | PVA/ $\text{H}_2\text{SO}_4$ <sub>4</sub> | 1 F $\text{cm}^{-2}$ at $2\text{mV S}^{-1}$      | 56 $\text{mW h cm}^{-3}$   | 24.9 $\text{W cm}^{-3}$ , | 10        |
| 3D Printed $\text{Ti}_3\text{C}_2\text{T}_x$ MXene/Cellulose Nanofiber               | PVA/ $\text{H}_2\text{SO}_4$ <sub>4</sub> | 70 $\text{Fg}^{-1}$ at 1 $\text{mA cm}^{-2}$     | 101 $\mu\text{Wh cm}^{-2}$ | 0.299 $\text{mW cm}^{-2}$ | 11        |
| $\text{Ti}_3\text{C}_2\text{T}_x$ coated carbon nanofiber structural supercapacitors | Li-G3]TFSI                                | 908 $\text{mF/g}^{-1}$ at 0.5 $\text{mA g}^{-1}$ |                            |                           | 12        |
| WCF-ZnCoSe-Mxene                                                                     |                                           | 14.55 $\text{F g}^{-1}$                          | 2.02 $\text{Wh kg}^{-1}$   | 36.75 $\text{Wkg}^{-1}$   | 13        |
| WCF-N@ZnCoSe-mxene                                                                   |                                           | 19.36 $\text{F g}^{-1}$                          | 2.69 $\text{Wh kg}^{-1}$   | 43.20 $\text{Wkg}^{-1}$   | 13        |
| MXene@PTC-12h                                                                        | PVA/ $\text{H}_2\text{SO}_4$ <sub>4</sub> |                                                  |                            |                           | 14        |
| TC-3DE supercapacitors                                                               | Xanthan gum/ $\text{H}_2\text{SO}_4$      | 30 $\text{Fg}^{-1}$                              | 1.767 $\text{Whkg}^{-1}$   | 20.64 $\text{Wkg}^{-1}$   | This work |

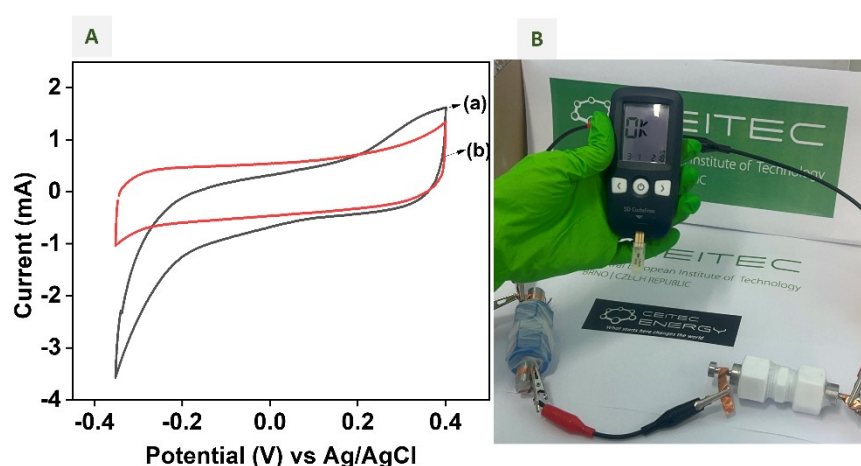

**Figure S7.** Cyclic voltammograms of sodium composite in (a) 1M  $\text{H}_2\text{SO}_4$  and (b) recycled 1M sodium lactate. (B) photograph of a glucometer powered up using SIB-a cells.

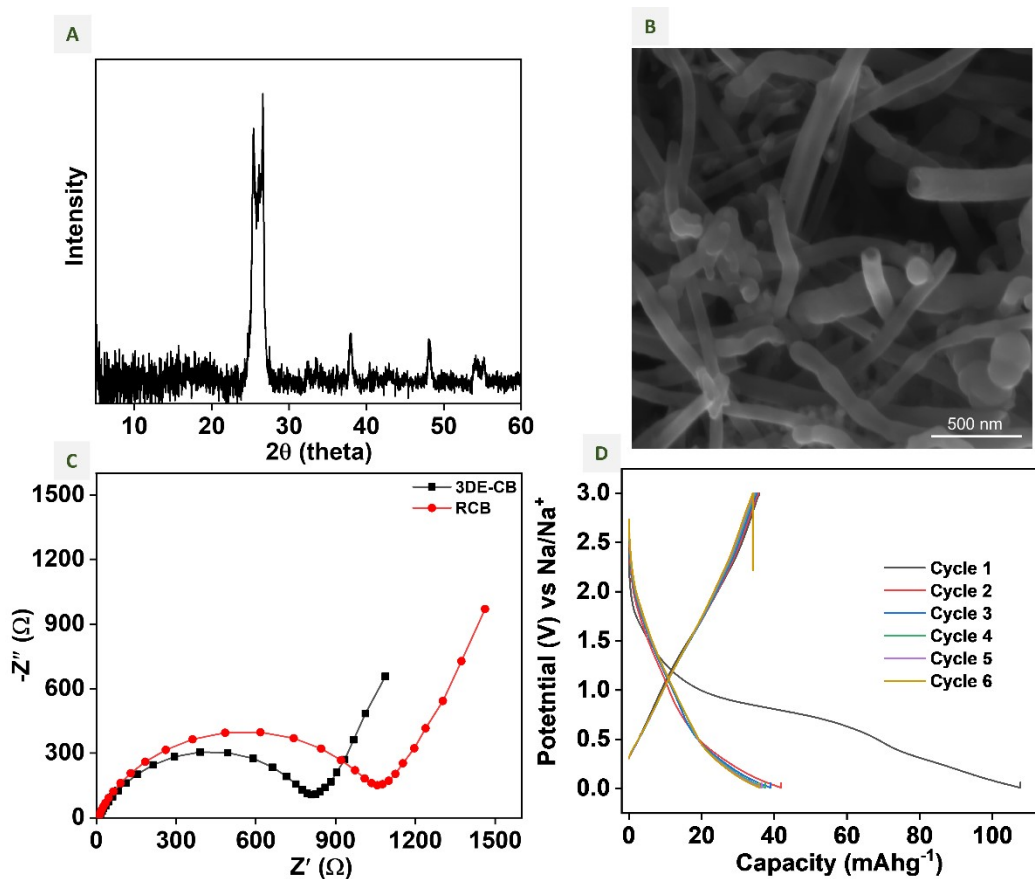

**Figure S8.** (A) XRD pattern, (B) SEM image of 3DE-CB (carbon black extracted from fresh PLA/Graphene filament). (C) Nyquist plot and (D) GCD curves (at 0.3C rate) of SIB-c cells.

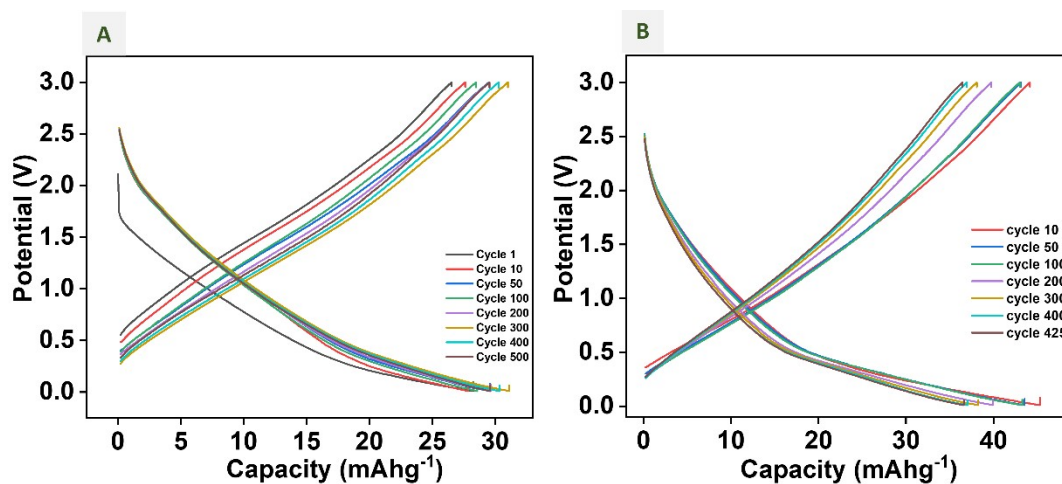

**Figure S9.** GCD curve of (A) SIB-a and (B) SIB-b cells for 500 cycles at 1C-rate.

## References

- (1) Liu, L.; Orbay, M.; Luo, S.; Duluard, S.; Shao, H.; Harmel, J.; Rozier, P.; Taberna, P.-L.; Simon, P. Exfoliation and Delamination of Ti<sub>3</sub>C<sub>2</sub>T<sub>x</sub> MXene Prepared via Molten Salt Etching Route. *ACS Nano* **2022**, *16* (1), 111-118. DOI: 10.1021/acsnano.1c08498.
- (2) Ma, G.; Shao, H.; Xu, J.; Liu, Y.; Huang, Q.; Taberna, P.-L.; Simon, P.; Lin, Z. Li-ion storage properties of two-dimensional titanium-carbide synthesized via fast one-pot method in air atmosphere. *Nature Communications* **2021**, *12* (1), 5085. DOI: 10.1038/s41467-021-25306-y.
- (3) Arole, K.; Blivin, J. W.; Saha, S.; Holta, D. E.; Zhao, X.; Sarmah, A.; Cao, H.; Radovic, M.; Lutkenhaus, J. L.; Green, M. J. Water-dispersible Ti<sub>3</sub>C<sub>2</sub>T<sub>z</sub> MXene nanosheets by molten salt etching. *iScience* **2021**, *24* (12), 103403. DOI: <https://doi.org/10.1016/j.isci.2021.103403>.
- (4) Chen, J.; Jin, Q.; Li, Y.; Shao, H.; Liu, P.; Liu, Y.; Taberna, P.-L.; Huang, Q.; Lin, Z.; Simon, P. Molten Salt-Shielded Synthesis (MS3) of MXenes in Air. *ENERGY & ENVIRONMENTAL MATERIALS* **2023**, *6* (2), e12328. DOI: <https://doi.org/10.1002/eem2.12328>.
- (5) Wang, G.; Yang, Z.; Wu, L.; Wang, J.; Liu, X. Studies on improved stability and electrochemical activity of titanium carbide MXene-polymer nanocomposites. *Journal of Electroanalytical Chemistry* **2021**, *900*, 115708. DOI: <https://doi.org/10.1016/j.jelechem.2021.115708>.
- (6) Saha, S.; Arole, K.; Radovic, M.; Lutkenhaus, J. L.; Green, M. J. One-step hydrothermal synthesis of porous Ti<sub>3</sub>C<sub>2</sub>T<sub>z</sub> MXene/rGO gels for supercapacitor applications. *Nanoscale* **2021**, *13* (39), 16543-16553, 10.1039/D1NR02114A. DOI: 10.1039/D1NR02114A.
- (7) Syamsai, R.; Kollu, P.; Kwan Jeong, S.; Nirmala Grace, A. Synthesis and properties of 2D-titanium carbide MXene sheets towards electrochemical energy storage applications. *Ceramics International* **2017**, *43* (16), 13119-13126. DOI: <https://doi.org/10.1016/j.ceramint.2017.07.003>.
- (8) Xu, Z.; Zhang, Y.; Liu, M.; Meng, Q.; Shen, C.; Xu, L.; Zhang, G.; Gao, C. Two-dimensional titanium carbide MXene produced by ternary cations intercalation via structural control with angstrom-level precision. *iScience* **2022**, *25* (12), 105562. DOI: <https://doi.org/10.1016/j.isci.2022.105562>.
- (9) Wang, X.; Garnero, C.; Rochard, G.; Magne, D.; Morisset, S.; Hurand, S.; Chartier, P.; Rousseau, J.; Cabioc'h, T.; Coutanceau, C.; et al. A new etching environment (FeF<sub>3</sub>/HCl) for the synthesis of two-dimensional titanium carbide MXenes: a route towards selective reactivity vs. water. *Journal of Materials Chemistry A* **2017**, *5* (41), 22012-22023, 10.1039/C7TA01082F. DOI: 10.1039/C7TA01082F.
- (10) Orangi, J.; Hamade, F.; Davis, V. A.; Beidaghi, M. 3D Printing of Additive-Free 2D Ti<sub>3</sub>C<sub>2</sub>T<sub>x</sub> (MXene) Ink for Fabrication of Micro-Supercapacitors with Ultra-High Energy Densities. *ACS Nano* **2020**, *14* (1), 640-650. DOI: 10.1021/acsnano.9b07325.
- (11) Zhou, G.; Li, M.-C.; Liu, C.; Wu, Q.; Mei, C. 3D Printed Ti<sub>3</sub>C<sub>2</sub>T<sub>x</sub> MXene/Cellulose Nanofiber Architectures for Solid-State Supercapacitors: Ink Rheology, 3D Printability, and Electrochemical Performance. *Advanced Functional Materials* **2022**, *32* (14), 2109593. DOI: <https://doi.org/10.1002/adfm.202109593>.
- (12) Dharmasiri, B.; Usman, K. A. S.; Qin, S. A.; Razal, J. M.; Tran, N. T.; Coia, P.; Harte, T.; Henderson, L. C. Ti<sub>3</sub>C<sub>2</sub>T<sub>x</sub> MXene coated carbon fibre electrodes for high performance structural supercapacitors. *Chemical Engineering Journal* **2023**, *476*, 146739. DOI: <https://doi.org/10.1016/j.cej.2023.146739>.
- (13) Deka, B. K.; Hazarika, A.; Kang, G.-H.; Hwang, Y. J.; Jaiswal, A. P.; Chan Kim, D.; Park, Y.-B.; Park, H. W. 3D-Printed Structural Supercapacitor with MXene-N@Zn-Co Selenide Nanowire Based Woven Carbon Fiber Electrodes. *ACS Energy Letters* **2023**, *8* (2), 963-971. DOI: 10.1021/acsenerylett.2c02505.
- (14) Zhu, G.; Hou, Y.; Lu, J.; Zhang, H.; Zhuang, Z.; Baig, M. M.; Khan, M. Z.; Akram, M. A.; Dong, S.; Liu, P.; et al. MXene decorated 3D-printed carbon black-based electrodes for solid-state micro-supercapacitors. *Journal of Materials Chemistry A* **2023**, *11* (46), 25422-25428, 10.1039/D3TA04573K. DOI: 10.1039/D3TA04573K.
